# Supplementary material for: Efficient degradation of sulfamethoxazole and the response of microbial communities in microbial fuel cells
Source: Royal Society of Chemistry journal article supplement (doi:10.1039/c5ra08438e), 2015-01-01
Supplement: c5ra08438e1.pdf [file c5ra08438e1.pdf]

## Supplementary materials

### Efficient degradation of sulfamethoxazole and the responses of microbial community in microbial fuel cells

Lu Wang,<sup>a</sup> Yicheng Wu,<sup>b</sup> Yue Zheng,<sup>a</sup> Lidan Liu,<sup>a</sup> and Feng Zhao<sup>a, \*</sup>

a, Key Laboratory of Urban Pollutant Conversion, Chinese Academy of Sciences  
Institute of Urban Environment, Chinese Academy of Sciences, Xiamen, 361021,  
China

b, Xiamen University of Technology, Xiamen, 361021, China

\*Corresponding Author, Phone/Fax: +86(0) 592 6190766, E-mail: [fzhao@iue.ac.cn](mailto:fzhao@iue.ac.cn).

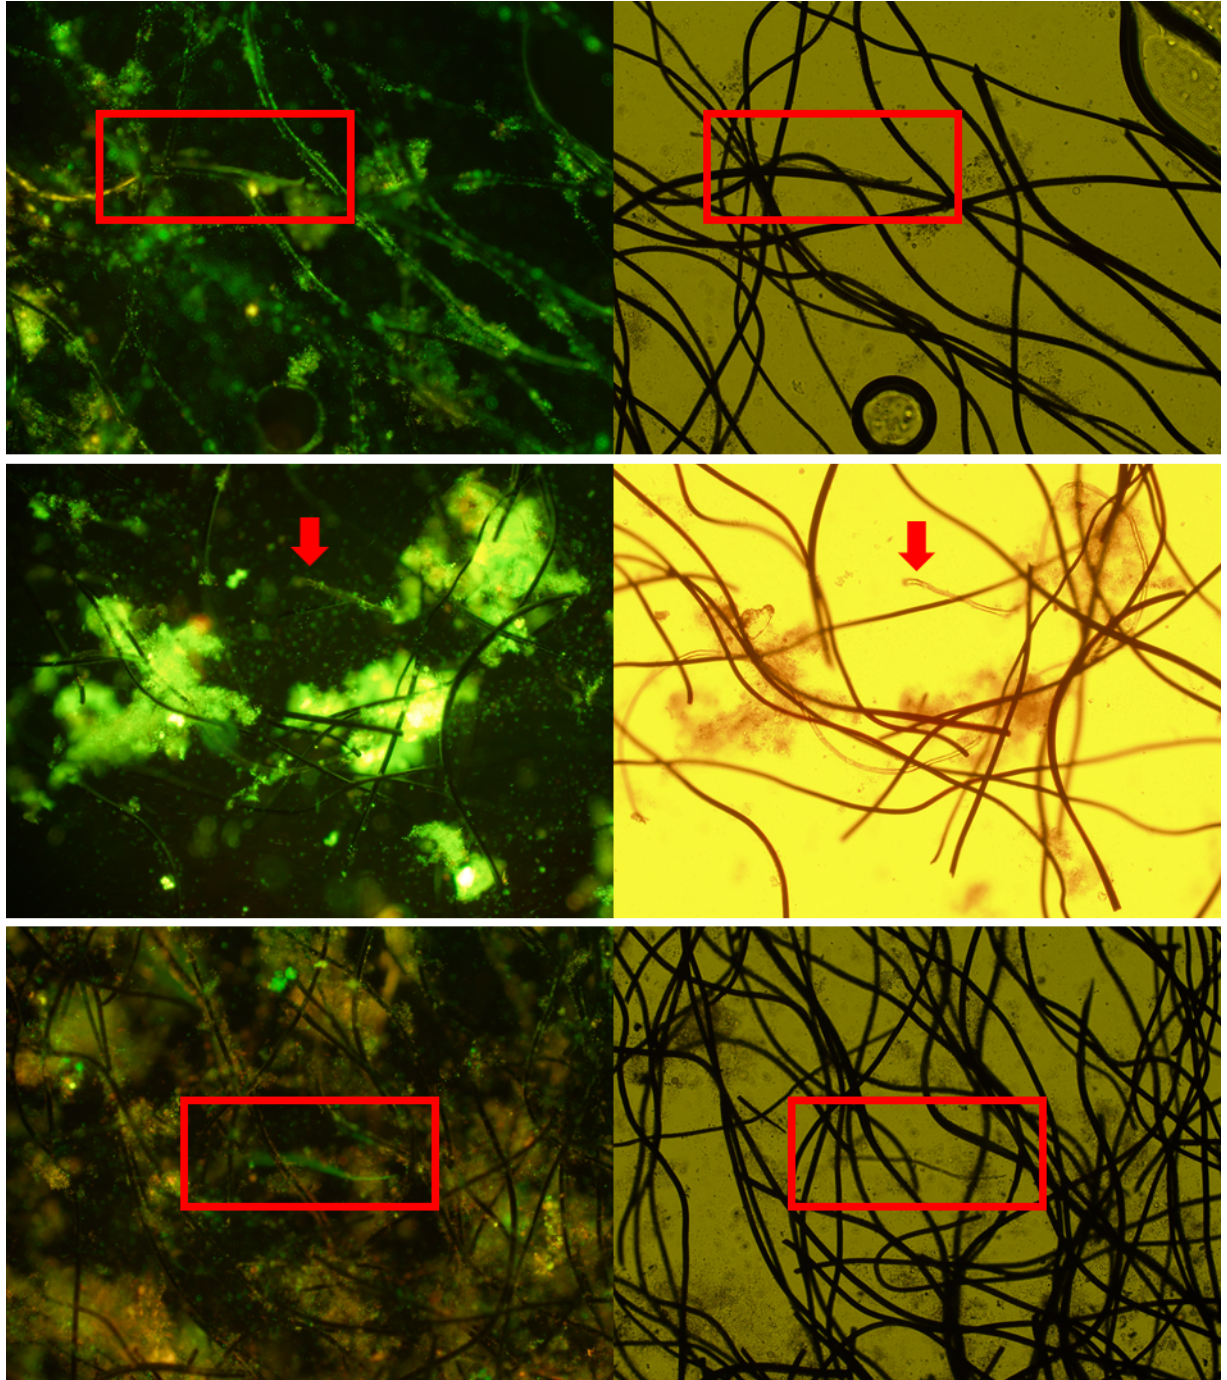

Figure S1. The pictures of suspected metazoans (identified by red boxes and arrows) which had been detected during the microscopy of electrode biofilm.

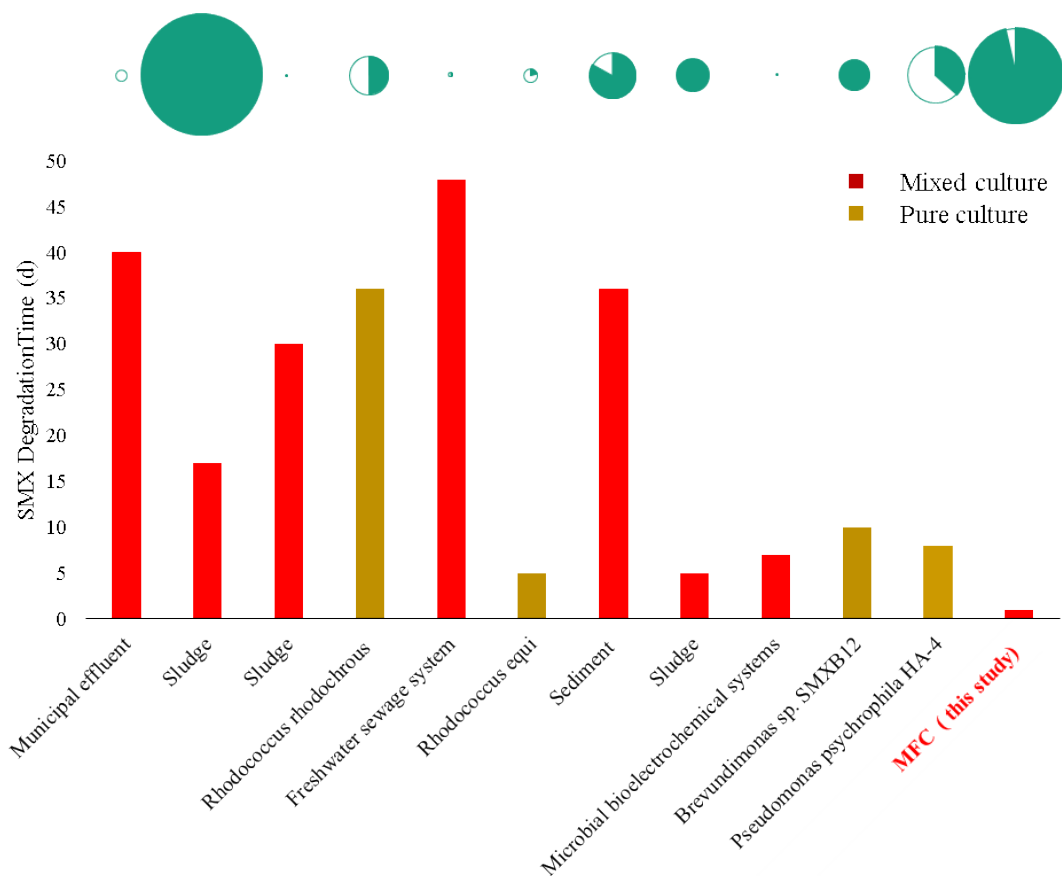

Figure S2. The comparison about SMX removal performance in this study and other published results<sup>1-11</sup>. The bottom description in bar chart refers to inoculation or reactor type of relevant studies (in chronological order). The size of pies represents the initial concentration of SMX added (3.8 ppm, 200 ppm, 49 ppb, 32 ppm, 100 ppb, 6.5 ppm, 27 ppm, 12 ppm, 6 ppb, 10 ppm, 100 ppm and 150 ppm respectively) and the covered area represents removal ratio of SMX.

1. A. Al-Ahmad, F. Daschner and K. Kümmerer, *Arch Environ Con Tox*, 1999, **37**, 158-163.
2. P. Drillia, S. N. Dokianakis, M. S. Fountoulakis, M. Kornaros, K. Stamatelatou and G. Lyberatos, *J Hazard Mater*, 2005, **122**, 259-265.
3. M. Carballa, F. Omil, T. Ternes and J. M. Lema, *Water Res*, 2007, **41**, 2139-2150.
4. H. Gauthier, V. Yargeau and D. G. Cooper, *Sci Total Environ*, 2010, **408**, 1701-1706.
5. B. Li and T. Zhang, *Environ Sci Technol*, 2010, **44**, 3468-3473.
6. S. Larcher and V. Yargeau, *Appl Microbiol Biot*, 2011, **91**, 211-218.
7. B. Xu, D. Mao, Y. Luo and L. Xu, *Bioresour Technol*, 2011, **102**, 7069-7076.
8. E. Müller, W. Schüssler, H. Horn and H. Lemmer, *Chemosphere*, 2013, **92**, 969-978.
9. F. Harnisch, C. Gimkiewicz, B. Bogunovic, R. Kreuzig and U. Schröder, *Electrochem Commun*, 2013, **26**, 77-80.
10. B. Herzog, H. Lemmer, H. Horn and E. Müller, *BMC Microbiology*, 2013, **13**, 276-285.
11. B. Jiang, A. Li, D. Cui, R. Cai, F. Ma and Y. Wang, *Appl Microbiol Biot*, 2014, **98**, 4671-4681.
